# Supplementary material for: Local Environment but Not Genetic Differentiation Influences Biparental Care in Ten Plover Populations
Source: PubMed Central journal article supplement (PMC3629256; doi:10.1371/journal.pone.0060998), 2013-04-17
Supplement: pone.0060998.s001.pdf [file pone.0060998.s001.pdf]

**A****00–02h**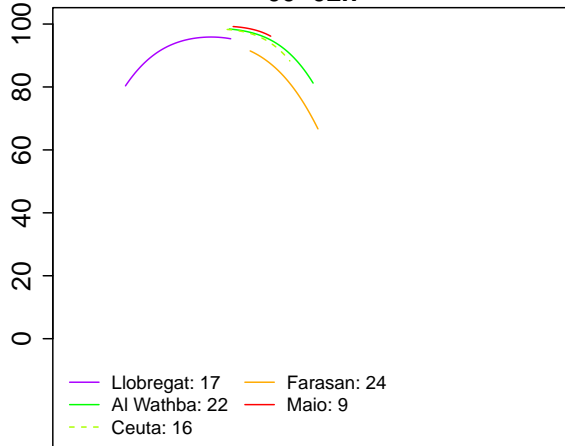**02–04h**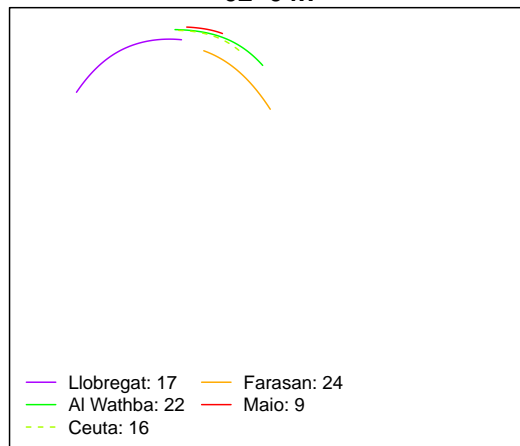**04–06h**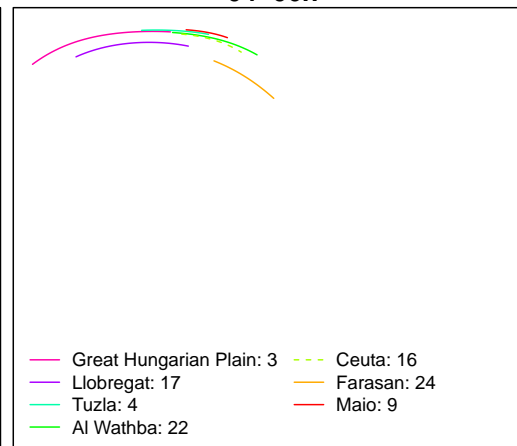**06–08h**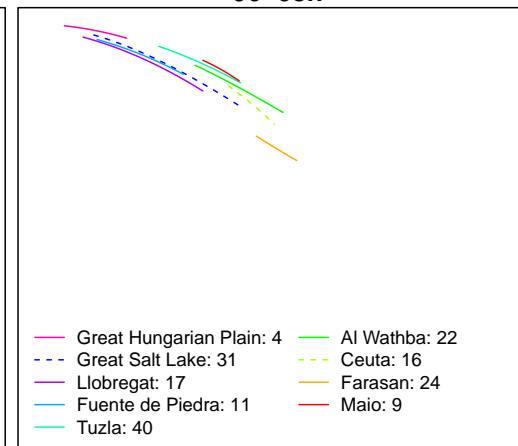**08–10h**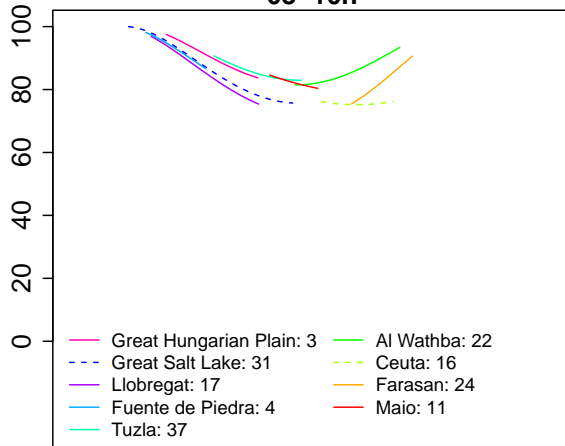**10–12h**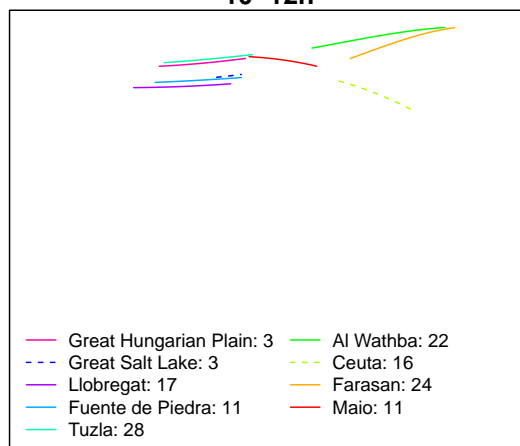**12–14h**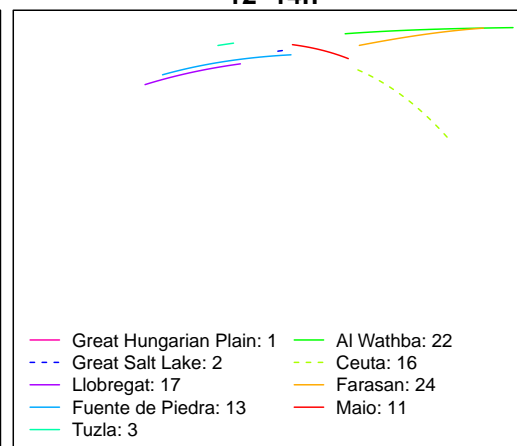**14–16h**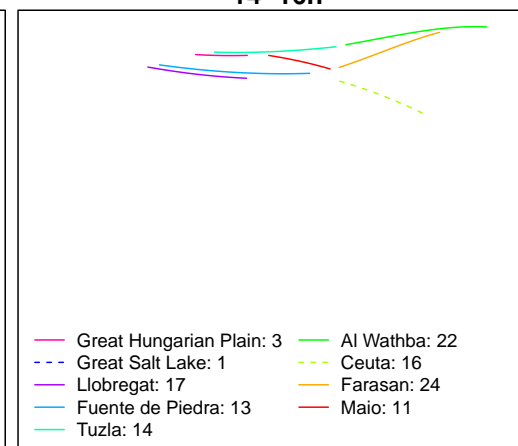**16–18h**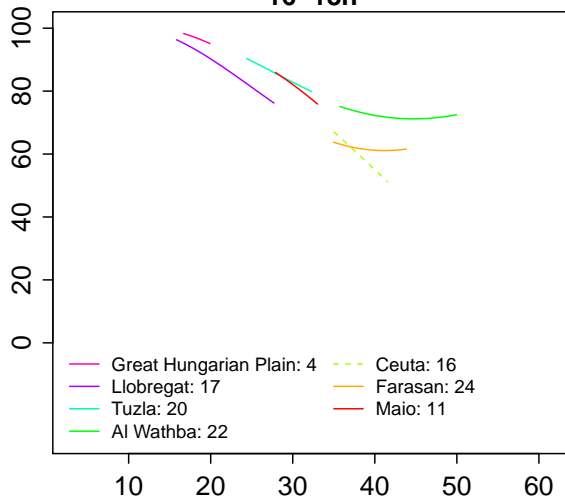**18–20h**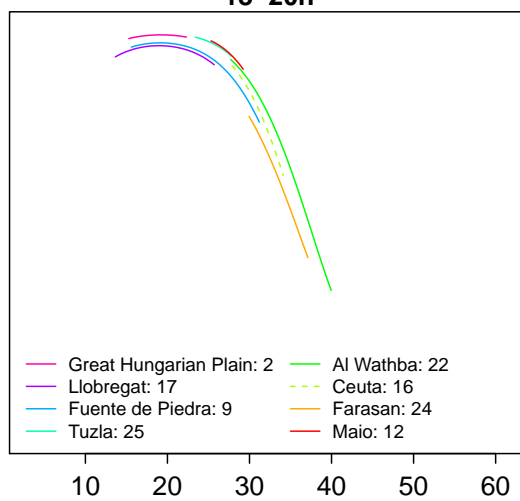**20–22h**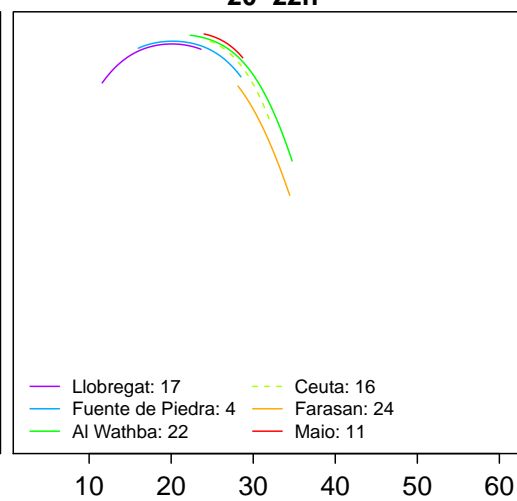**22–24h**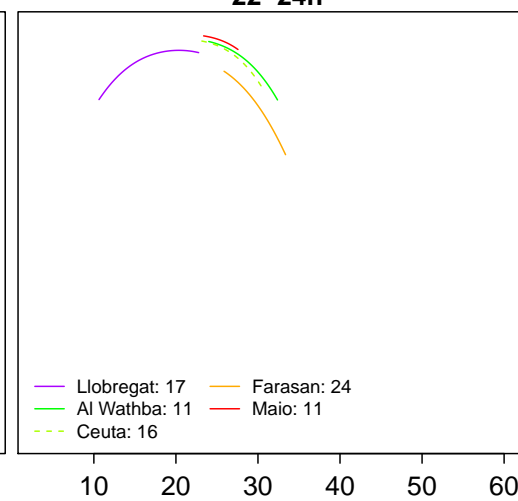**Temperature (°C)**

**B****00–02h**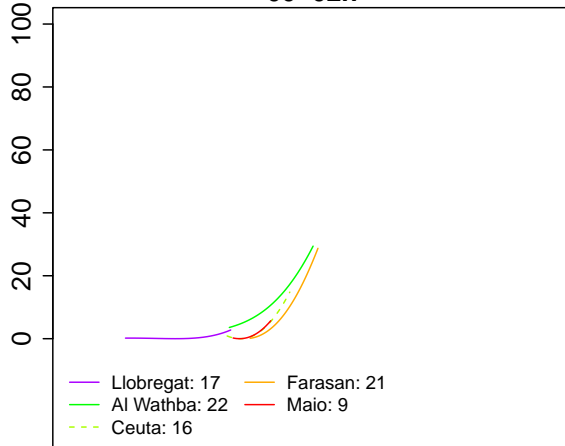**02–04h**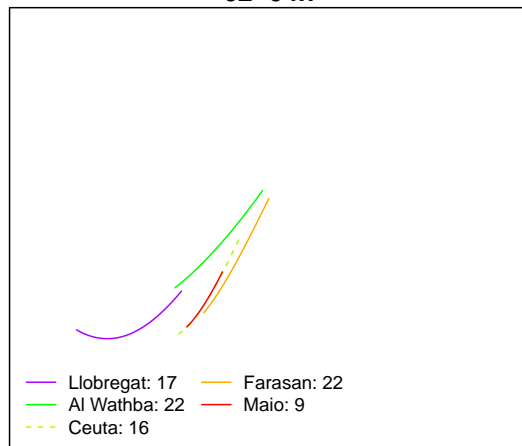**04–06h**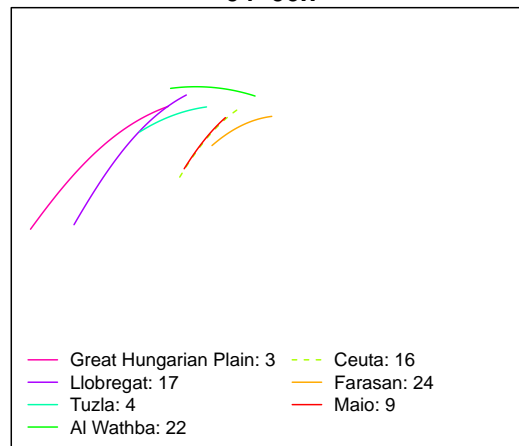**06–08h**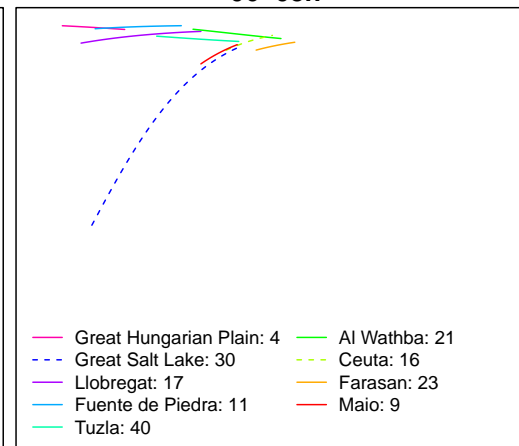**08–10h**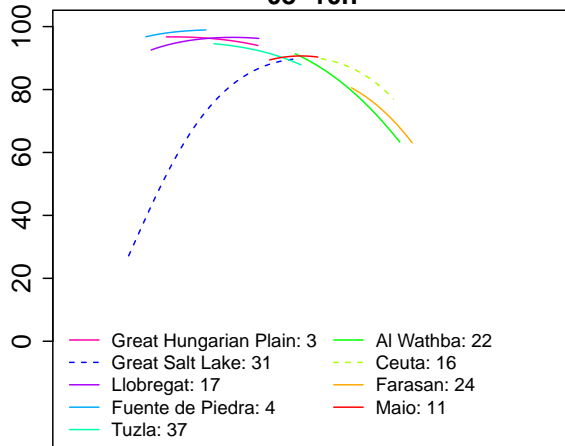**10–12h**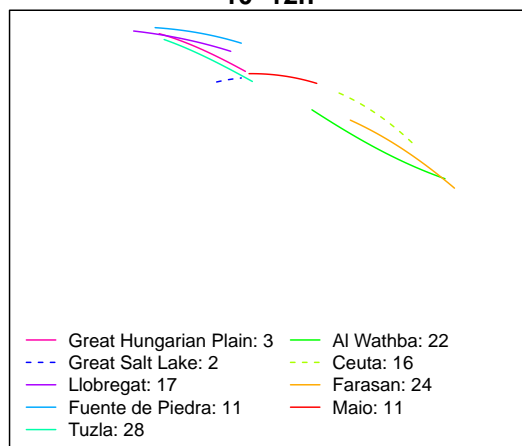**12–14h**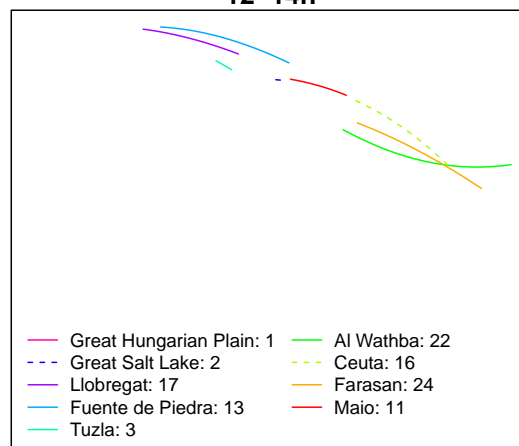**14–16h**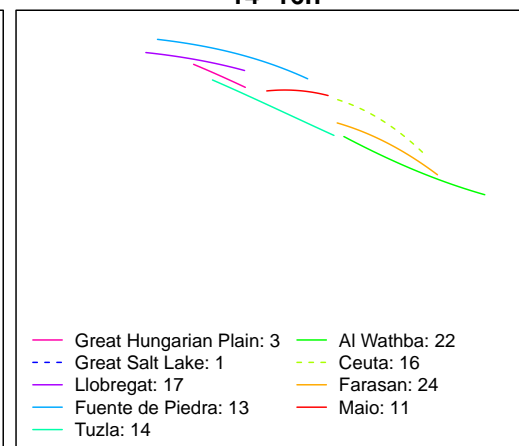**16–18h**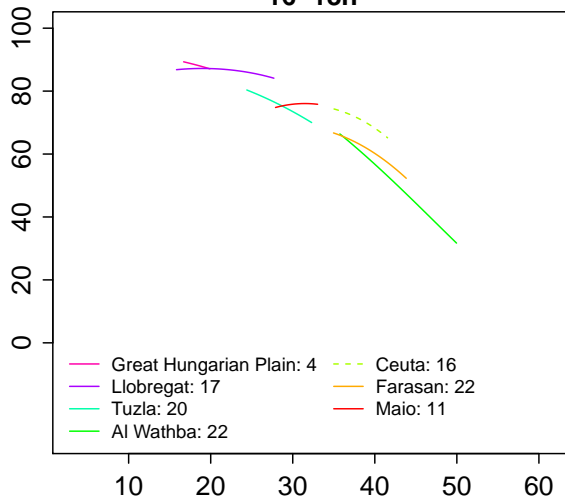**18–20h**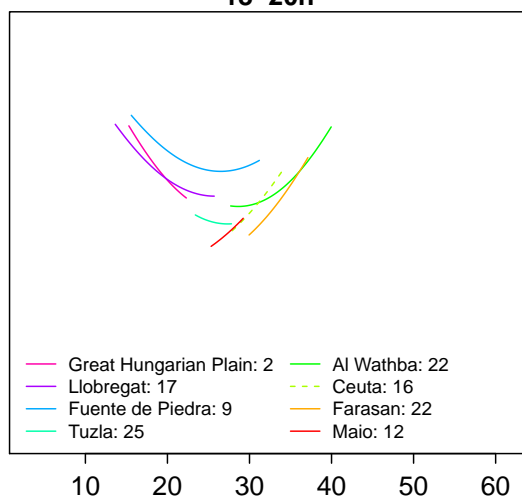**20–22h**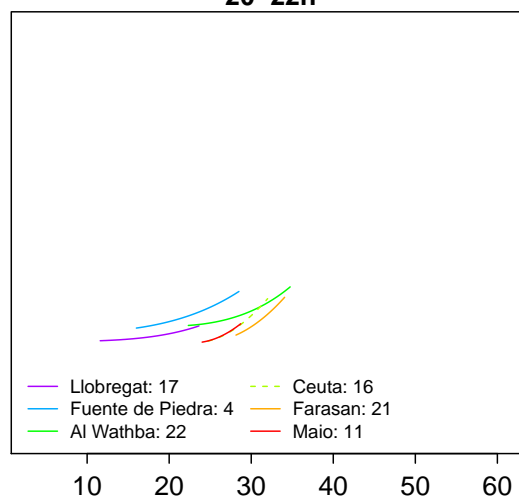**22–24h**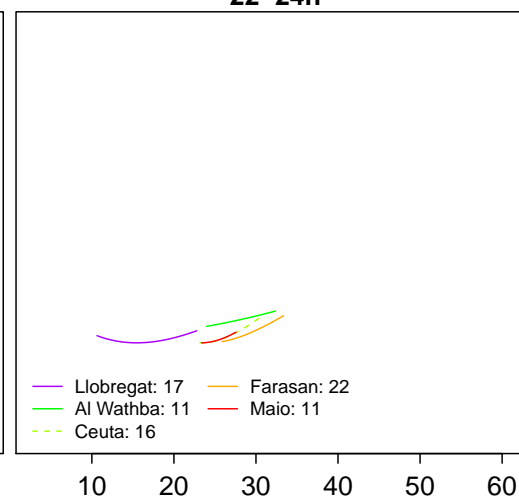

Temperature (°C)
